# Supplementary material
Source: PubMed Central journal article supplement (PMC6784852)
Supplement: jamaneurol-77-73-s001.pdf [file jamaneurol-77-73-s001.pdf]

## Supplementary Online Content

McDonald NM, Senturk D, Scheffler A, et al. Developmental trajectories of infants with multiplex family risk for autism: a Baby Siblings Research Consortium study. *JAMA Neurol*. Published online October 7, 2019. doi:10.1001/jamaneurol.2019.3341

**eFigure 1.** Depiction of Raw Data for ASD Symptoms, Cognitive Abilities, and Adaptive Skills

**eFigure 2.** 36-Month Outcome Data by Familial-Risk Group in Children without ASD

**eTable.** Participant Information by Outcome Group

This supplementary material has been provided by the authors to give readers additional information about their work.

**eFigure 1.** Depiction of Raw Data for ASD Symptoms, Cognitive abilities, and Adaptive Skills

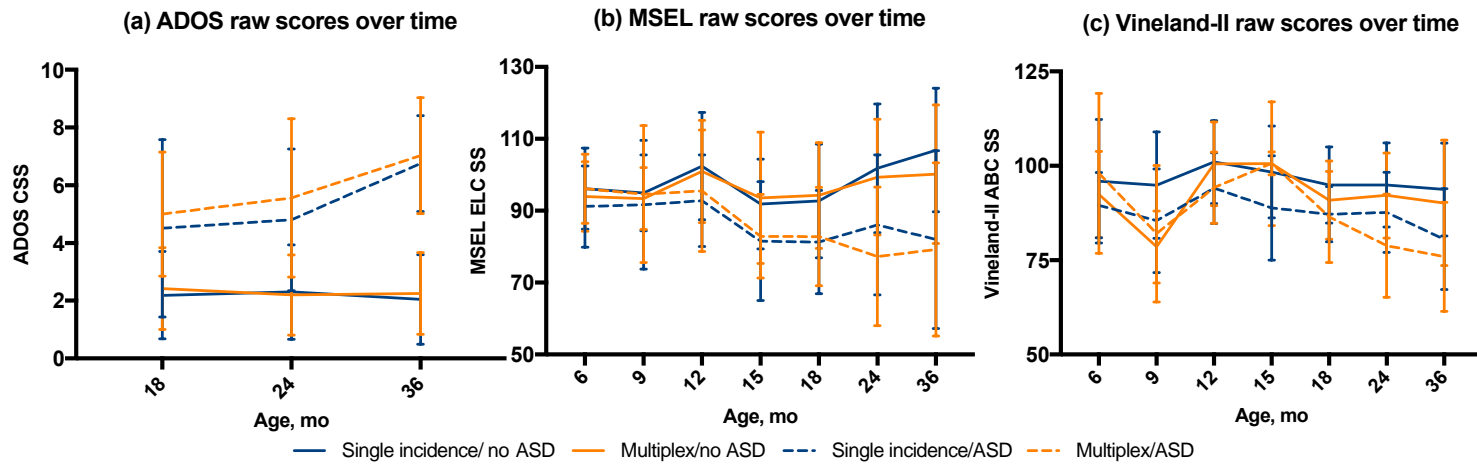

Note. Sample size varied by age (see Table 2 for details). ASD symptoms measured by ADOS calibrated severity score (1-10). Cognitive abilities measures by MSEL composite standard score ( $M=100$ ,  $SD=15$ ). Adaptive skills measured by Vineland-II composite standard score ( $M=100$ ,  $SD=15$ ). ASD=Autism spectrum disorder. ADOS=Autism Diagnostic Observation Schedule. MSEL=Mullen Scales of Early Learning.

**eFigure 2.** 36-month Outcome Data by Familial-Risk Group in Children Without ASD

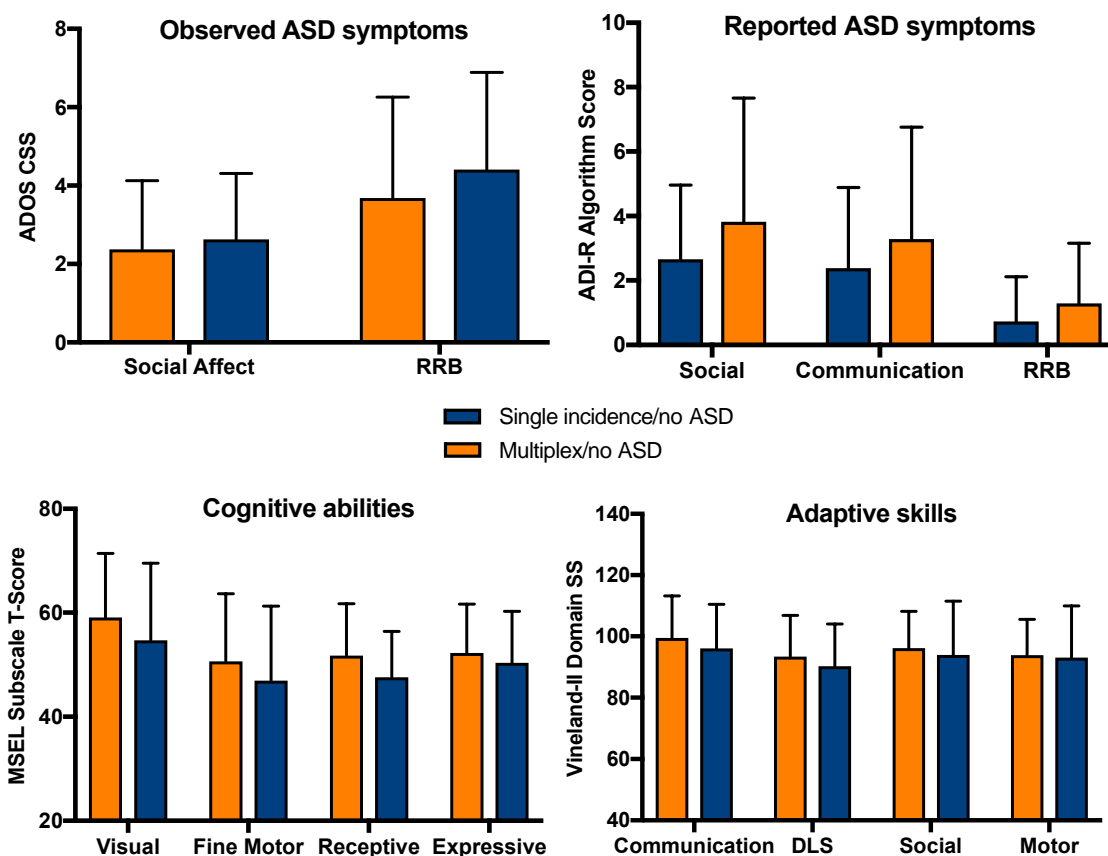

*Note.* Sample size varied by measure (see Table 2 for details). Observed ASD symptoms measured by ADOS calibrated severity score (1-10). Reported ASD symptoms measured by ADI-R. Cognitive abilities measures by MSEL composite standard score ( $M=100$ ,  $SD=15$ ). Adaptive skills measured by Vineland-II composite standard score ( $M=100$ ,  $SD=15$ ). ASD=Autism spectrum disorder. ADOS=Autism Diagnostic Observation Schedule. CSS=Calibrated Severity Score. RRB=Repetitive, Restricted Behaviors. MSEL=Mullen Scales of Early Learning. Visual=Visual Reception. Receptive=Receptive Language. Expressive=Expressive Language. DLS=Daily Living Skills.

**eTable.** Participant Information by Outcome Group

| 36-mo Outcome Variable <sup>a</sup> | Mean (SD)         |                    |               |
|-------------------------------------|-------------------|--------------------|---------------|
|                                     | Typical (n = 227) | Atypical (n = 122) | ASD (n = 86)  |
| ASD symptoms (ADOS)                 |                   |                    |               |
| Overall                             | 1.30 (0.46)       | 3.52 (1.77)        | 6.85 (1.78)   |
| Social affect                       | 1.64 (0.77)       | 3.85 (2.08)        | 6.67 (1.83)   |
| RRB                                 | 3.10 (2.37)       | 5.07 (2.45)        | 7.58 (1.91)   |
| Cognitive abilities (MSEL)          |                   |                    |               |
| Early learning composite            | 110.49 (14.37)    | 96.90 (19.84)      | 81.06 (24.42) |
| Visual reception                    | 61.25 (10.31)     | 53.14 (15.14)      | 42.54 (18.84) |
| Fine motor                          | 52.90 (12.65)     | 44.73 (12.81)      | 36.12 (12.75) |
| Receptive language                  | 52.77 (8.84)      | 46.61 (9.86)       | 38.52 (14.31) |
| Expressive language                 | 54.14 (7.82)      | 47.84 (10.94)      | 39.81 (13.56) |
| Adaptive skills (Vineland-II)       |                   |                    |               |
| Adaptive behavior composite         | 94.95 (12.11)     | 90.37 (13.84)      | 79.14 (13.73) |
| Communication                       | 100.90 (13.18)    | 96.12 (14.16)      | 85.22 (16.32) |
| Daily living skills                 | 94.95 (11.41)     | 89.95 (15.90)      | 80.55 (14.04) |
| Socialization                       | 97.66 (12.68)     | 92.97 (12.85)      | 79.59 (13.21) |
| Motor skills                        | 94.88 (12.06)     | 92.00 (12.71)      | 84.83 (12.78) |

Abbreviations: ADOS, Autism Diagnostic Observation Schedule; ASD, autism spectrum disorder; MSEL, Mullen Scales of Early Learning; RRB, restricted, repetitive behavior; Vineland-II, Vineland Adaptive Behavior Scales–Second Edition.

<sup>a</sup>Groups differed on all outcome variables. Group differences between categorical variables assessed using  $\chi^2$  tests, and continuous variables using *t* tests. Autism Diagnostic Observation Schedule calibrated severity score (range, 1-10), Vineland-II composite and domain standard scores (mean [SD], 100 [15]), MSEL composite standard score (mean [SD], 100 [15]), and subscale *t* scores (mean [SD], 50 [10]) are presented.
